# Supplementary material for: Rhodium-catalyzed C–H activation and conjugate addition under mild conditions
Source: Royal Society of Chemistry journal article supplement (doi:10.1039/c1ob05993a), 2011-01-01

## Electronic Supplementary Information

### **Rhodium-Catalyzed C-H Activation and Conjugate Addition under Mild Conditions**

**Luo Yang, Camille A. Correia, and Chao-Jun Li\***

Department of Chemistry, McGill University, 801 Sherbrooke Street West, Montreal,  
Quebec H3A 2K6, Canada

*E-mail: [cj.li@mcgill.ca](mailto:cj.li@mcgill.ca)*

Present address of Luo Yang: College of Chemistry, Xiangtan University, Xiangtan,  
411105, China

#### **Table of Contents**

|                                                                                    |                |
|------------------------------------------------------------------------------------|----------------|
| <b>1. General information</b>                                                      | <b>S1</b>      |
| <b>2. General experimental procedure for C-H activation and conjugate addition</b> | <b>S2</b>      |
| <b>3. Characterization data of product 3a-3v</b>                                   | <b>S3-S9</b>   |
| <b>4. Copies of <sup>1</sup>H and <sup>13</sup>C NMR spectra of products 3a-3v</b> | <b>S10-S32</b> |

#### **1. General information**

Thin-layer chromatography (TLC) was performed using E. Merck silica gel 60 F254 precoated plates (0.25 mm) or Sorbent Silica Gel 60 F254 plates. The developed chromatography was analyzed by UV lamp (254 nm). High-resolution mass spectra (HRMS) were obtained from a JEOL JMS-700 instrument (ESI). IR spectra were recorded by a Nexus 670 Avator FTIR spectrometer. Nuclear magnetic resonance (NMR) spectra were recorded on Varian MERCURY plus spectrometer (<sup>1</sup>H 500 MHz, <sup>13</sup>C 125 MHz). NMR yield was calculated based on the integration using mesitylene as an internal standard. Chemical shifts for <sup>1</sup>H NMR spectra are reported in parts per million (ppm) from tetramethylsilane with the solvent resonance as the internal standard (chloroform: δ 7.26 ppm). Chemical shifts for <sup>13</sup>C NMR spectra are reported in parts per million (ppm) from tetramethylsilane with the solvent as the internal standard (CDCl<sub>3</sub>: δ

77.23 ppm). Data are reported as following: chemical shift, multiplicity (s = singlet, d = doublet, dd = doublet of doublets, t = triplet, q = quartet, p = quintet, m = multiplet, br = broad signal), coupling constant (Hz), and integration.

**Reagents:** Unless stated otherwise, 2-phenylpyridine analogs **1a-1n** were synthesized starting from 2-bromopyridine (analog) and arylboronic acid following the method reported by Yang *et al.*<sup>1</sup> 1-Phenylpyrazole (**1o**) was synthesized starting from pyrazole and iodobenzene following the method reported by You *et al.*<sup>2</sup> Rhodium catalysts were purchased from Strem Chemicals and used directly without further purification. Substituted cinnaldehydes (**2g-2h**) were synthesized starting from the corresponding aryl iodides or bromides with acrolein diethyl acetal in the presence of Pd(OAc)<sub>2</sub> following the method reported by Cacchi *et al.*<sup>3</sup> Dichloromethane was dried over CaH<sub>2</sub> and used after distillation.

## 2. General experimental procedure for the rhodium-catalyzed C-H activation and conjugate addition

A general experimental procedure is described as following: An oven-dried reaction vessel was charged with (CH<sub>3</sub>CN)<sub>3</sub>Cp\*Rh(SbF<sub>6</sub>)<sub>2</sub> (Rh\*, 8.4 mg, 5 mol%, 0.01 mmol), CH<sub>2</sub>Cl<sub>2</sub> (1 mL, dried over CaH<sub>2</sub>), 2-phenylpyridine (**1a**, 31 mg, 0.2 mmol) and 2-cyclohexenone (**2a**, 0.4 mmol, 38.4 mg, 40.2 μL) under argon. The vessel was sealed and heated at 40 °C (oil bath temperature) for 48 h. The resulting mixture was cooled to room temperature, filtered through a short silica gel pad and transferred to silica gel column directly and eluted with hexanes and ethyl acetate (2:1) to give product **3a** (47.6 mg, 95 % yield).

## 3. Characterization data of product 3a-3v

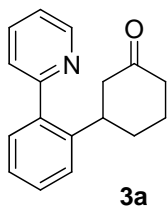

<sup>1</sup> C. Liu, W. Yang, *Chem. Commun.* **2009**, 6267-6269.

<sup>2</sup> L. Zhu, P. Guo, G. Li, J. Lan, R. Xie, J. You, *J. Org. Chem.* **2007**, 72, 8535-8538.

<sup>3</sup> G. Battistuzzi, S. Cacchi, G. Fabrizi, *Org. Lett.* **2003**, 5, 777-780.

**3a:**  $^1\text{H}$  NMR (500 MHz,  $\text{CDCl}_3$ , TMS)  $\delta$  8.67 (ddd,  $J=1.0, 2.0, 5.0$  Hz, 1H), 7.76 (td,  $J=2.0, 8.0$  Hz, 1H), 7.40-7.44 (m, 2H), 7.26-7.36 (m, 4H), 3.27-3.33 (m, 1H), 2.53 (d,  $J=8.5$  Hz, 2H), 2.30-2.39 (m, 2H), 2.04-2.09 (m, 2H), 1.79-1.87 (m, 1H), 1.53-1.62 (m, 1H);  $^{13}\text{C}$  NMR (125 MHz,  $\text{CDCl}_3$ , TMS)  $\delta$  211.4, 159.8, 149.2, 142.4, 140.0, 136.8, 130.4, 129.0, 126.6, 126.3, 124.4, 122.2, 49.1, 41.4, 40.3, 33.0, 25.7. HRMS (ESI)  $m/z$ :  $[\text{M}+\text{H}]^+$  calcd for  $\text{C}_{17}\text{H}_{18}\text{ON}$ , 252.1383; found: 252.1376.

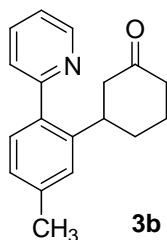

**3b:**  $^1\text{H}$  NMR (500 MHz,  $\text{CDCl}_3$ , TMS)  $\delta$  8.65 (ddd,  $J=1.0, 2.0, 5.0$  Hz, 1H), 7.73 (td,  $J=2.0, 8.0$  Hz, 1H), 7.32 (dt,  $J=1.0, 8.0$  Hz, 1H), 7.23-7.26 (m, 3H), 7.11-7.13 (m, 1H), 3.28-3.34 (m, 1H), 2.52-2.54 (m, 2H), 2.42 (s, 3H), 2.30-2.40 (m, 2H), 2.03-2.10 (m, 2H), 1.78-1.87 (m, 1H), 1.52-1.62 (m, 1H);  $^{13}\text{C}$  NMR (125 MHz,  $\text{CDCl}_3$ , TMS)  $\delta$  211.5, 159.9, 149.3, 142.2, 138.7, 136.7, 130.3, 127.4, 127.0, 124.4, 122.0, 49.1, 41.5, 40.2, 33.0, 25.8, 21.7. HRMS (ESI)  $m/z$ :  $[\text{M}+\text{H}]^+$  calcd for  $\text{C}_{18}\text{H}_{20}\text{ON}$ , 266.1539; found: 266.1529.

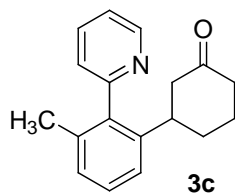

**3c:** a pair of diastereomers.  $^1\text{H}$  NMR (400 MHz,  $\text{CDCl}_3$ , TMS)  $\delta$  8.68-8.71 (m, 1H), 7.74-7.77 (m, 1H), 7.14-7.33 (m, 4H), 7.14 (d,  $J=7.2$  Hz, 1H), 2.23-2.66 (m, 5H), 1.97-2.03 (m, 5H), 1.69-1.84 (m, 1H), 1.36-1.47 (m, 1H);  $^{13}\text{C}$  NMR (125 MHz,  $\text{CDCl}_3$ , TMS)  $\delta$  211.4, 211.0, 159.3, 150.2, 149.8, 142.2, 140.0, 136.7, 136.5, 136.3, 128.6, 128.4, 124.7, 124.5, 123.3, 123.2, 122.2, 48.9, 48.8, 41.4, 41.3, 41.1, 32.9, 25.7, 25.6, 20.7. HRMS (ESI)  $m/z$ :  $[\text{M}+\text{H}]^+$  calcd for  $\text{C}_{18}\text{H}_{20}\text{ON}$ , 266.1539; found: 266.1536.

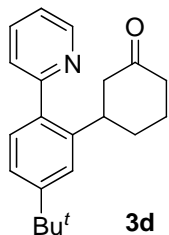

**3d:**  $^1\text{H}$  NMR (500 MHz,  $\text{CDCl}_3$ , TMS)  $\delta$  8.65 (ddd,  $J=1.0, 1.5, 5.0$  Hz, 1H), 7.73 (td,  $J=2.0, 8.0$  Hz, 1H), 7.42 (d,  $J=2.0$  Hz, 1H), 7.35 (dt,  $J=1.0, 6.5$  Hz, 1H), 7.32 (d,  $J=2.0$  Hz, 1H), 7.26-7.28 (m, 1H), 7.24 (ddd,  $J=1.0, 5.0, 7.5$  Hz, 1H), 3.32-3.38 (m, 1H), 2.55 (d,  $J=8.5$  Hz, 2H), 2.32-2.38 (m, 2H), 2.03-2.07 (m, 2H), 1.80-1.88 (m, 1H), 1.58-1.63 (m, 1H), 1.35 (s, 9H);  $^{13}\text{C}$  NMR (125 MHz,  $\text{CDCl}_3$ , TMS)  $\delta$  211.6, 160.0, 151.9, 149.3, 141.8, 137.3, 136.6, 130.1, 124.3, 123.7, 123.0, 122.0, 49.2, 41.5, 40.4, 35.0, 33.0, 31.6, 25.7. HRMS (ESI)  $m/z$ :  $[\text{M}+\text{H}]^+$  calcd for  $\text{C}_{21}\text{H}_{26}\text{ON}$ , 308.2009; found: 308.1996.

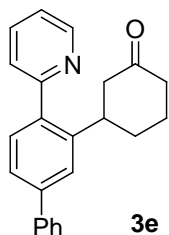

**3e:**  $^1\text{H}$  NMR (500 MHz,  $\text{CDCl}_3$ , TMS)  $\delta$  8.69 (ddd,  $J=1.0, 2.0, 5.0$  Hz, 1H), 7.77 (td,  $J=2.0, 7.5$  Hz, 1H), 7.63-7.65 (m, 3H), 7.53 (dd,  $J=2.0, 8.0$  Hz, 1H), 7.37-7.49 (m, 5H), 7.27 (ddd,  $J=1.0, 4.5, 7.5$  Hz, 1H), 3.38-3.43 (m, 1H), 2.60 (d,  $J=7.0$  Hz, 2H), 2.32-2.39 (m, 2H), 2.07-2.13 (m, 2H), 1.87-1.95 (m, 1H), 1.59-1.63 (m, 1H);  $^{13}\text{C}$  NMR (125 MHz,  $\text{CDCl}_3$ , TMS)  $\delta$  211.2, 159.7, 149.5, 142.8, 141.9, 141.1, 139.1, 136.6, 130.9, 129.0, 127.7, 127.4, 125.4, 125.2, 124.3, 122.2, 49.1, 41.4, 40.4, 33.0, 25.8. HRMS (ESI)  $m/z$ :  $[\text{M}+\text{H}]^+$  calcd for  $\text{C}_{23}\text{H}_{21}\text{ON}$ , 328.1696; found: 328.1691.

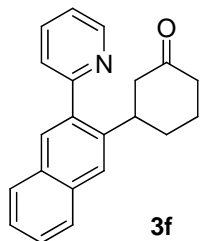

**3f:**  $^1\text{H}$  NMR (500 MHz,  $\text{CDCl}_3$ , TMS)  $\delta$  8.70 (m, 1H), 7.78-7.86 (m, 1H), 7.45-7.47 (m, 5H), 7.49-7.52 (m, 3H), 7.28-7.32 (m, 1H), 3.52-3.58 (m, 1H), 2.60-2.66 (m, 2H), 2.33-2.42 (m, 2H), 2.04-2.16 (m, 2H), 1.84-1.92 (m, 1H), 1.56-1.64 (m, 1H);  $^{13}\text{C}$  NMR (125 MHz,  $\text{CDCl}_3$ , TMS)  $\delta$

211.5, 160.0, 149.3, 140.7, 138.9, 136.8, 133.5, 132.0, 129.8, 128.0, 127.6, 126.7, 126.3, 125.2, 124.5, 122.2, 49.1, 41.5, 40.1, 33.1, 25.6.

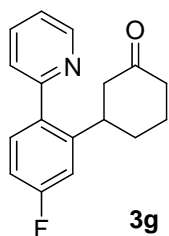

**3g:**  $^1\text{H}$  NMR (500 MHz,  $\text{CDCl}_3$ , TMS)  $\delta$  8.65 (ddd,  $J=1.0, 1.5, 5.0$  Hz, 1H), 7.74 (td,  $J=1.5, 7.5$  Hz, 1H), 7.25-7.32 (m, 3H), 7.11 (dd,  $J=3.0, 10.5$  Hz, 1H), 6.99 (td,  $J=2.5, 8.5$  Hz, 1H), 3.28-3.34 (m, 1H), 2.29-2.54 (m, 4H), 2.03-2.09 (m, 2H), 1.74-1.82 (m, 1H), 1.55-1.61 (m, 1H);  $^{13}\text{C}$  NMR (125 MHz,  $\text{CDCl}_3$ , TMS)  $\delta$  210.8, 164.2, 162.2, 159.0, 149.5, 145.0 (d,  $J=6.9$  Hz), 136.8, 136.2 (d,  $J=3.2$  Hz), 132.1 (d,  $J=8.4$  Hz), 124.3, 122.3, 113.4 (q,  $J=20.9$  Hz), 48.8, 41.3, 40.3, 32.8, 25.6. HRMS (ESI)  $m/z$ :  $[\text{M}+\text{H}]^+$  calcd for  $\text{C}_{17}\text{H}_{17}\text{ONF}$ , 270.1289; found: 270.1286.

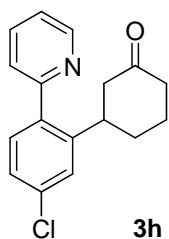

**3h:**  $^1\text{H}$  NMR (500 MHz,  $\text{CDCl}_3$ , TMS)  $\delta$  8.65 (m, 1H), 7.75 (td,  $J=1.5, 7.5$  Hz, 1H), 7.39 (s, 1H), 7.31 (d,  $J=8.0$  Hz, 1H), 7.25-7.28 (m, 3H), 3.27-3.33 (m, 1H), 2.29-2.54 (m, 4H), 2.03-2.09 (m, 2H), 1.76-1.84 (m, 1H), 1.54-1.60 (m, 1H);  $^{13}\text{C}$  NMR (125 MHz,  $\text{CDCl}_3$ , TMS)  $\delta$  210.6, 158.8, 149.5, 144.4, 138.6, 136.8, 134.8, 131.7, 126.8, 126.6, 124.2, 122.4, 48.8, 41.3, 40.2, 32.8, 25.6. HRMS (ESI)  $m/z$ :  $[\text{M}+\text{H}]^+$  calcd for  $\text{C}_{17}\text{H}_{17}\text{ONCl}$ , 286.0993; found: 286.0986.

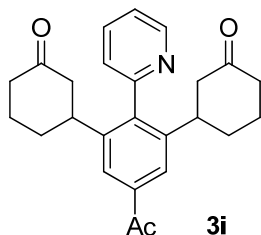

**3i:** two pairs of diastereomers.  $^1\text{H}$  NMR (400 MHz,  $\text{CDCl}_3$ , TMS)  $\delta$  8.66-8.73 (m, 1H), 7.87-7.88 (m, 2H), 7.72-7.81 (m, 1H), 7.31-7.34 (m, 1H), 7.16 (ddd,  $J=1.0, 2.0, 8.0$  Hz, 1H), 2.66 (s, 3H), 2.26-2.64 (m, 10H), 1.68-2.06 (m, 6H), 1.35-1.45 (m, 2H);  $^{13}\text{C}$  NMR (125 MHz,  $\text{CDCl}_3$ , TMS)  $\delta$

210.59, 210.49, 210.20, 210.17, 157.52, 157.49, 158.58, 150.25, 149.92, 143.95, 143.86, 143.68, 143.61, 143.60, 137.76, 137.08, 136.65, 136.24, 124.52, 124.34, 124.22, 124.16, 124.12, 123.97, 122.99, 122.96, 48.81, 48.73, 48.56, 48.50, 41.46, 41.28, 41.26, 41.19, 32.81, 32.78, 32.76, 26.91, 25.66, 25.64, 25.54. HRMS (ESI)  $m/z$ :  $[M+H]^+$  calcd for  $C_{25}H_{28}O_3N$ , 390.2064; found: 390.2060.

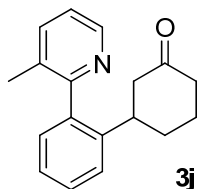

**3j**:  $^1H$  NMR (500 MHz,  $CDCl_3$ , TMS)  $\delta$  8.48 (d,  $J=4.0$  Hz, 1H), 7.57 (dd,  $J=1.0, 8.0$  Hz, 1H), 7.41 (d,  $J=1.0$  Hz, 1H), 7.40 (d,  $J=1.0$  Hz, 1H), 7.27-7.30 (m, 1H), 7.19 (dd,  $J=5.0, 8.0$  Hz, 1H), 7.15 (dt,  $J=1.0, 7.5$  Hz, 1H), 2.73 (br, 1H), 2.57 (br, 1H), 2.26-2.34 (m, 3H), 2.08 (s, 3H), 1.99-2.04 (m, 1H), 1.71 (br, 2H), 1.45-1.50 (m, 1H);  $^{13}C$  NMR (125 MHz,  $CDCl_3$ , TMS)  $\delta$  211.4, 159.1, 146.8, 142.1, 139.7, 138.1, 131.7, 129.3, 128.7, 126.6, 126.0, 122.6, 48.5, 41.4, 41.0, 33.1, 25.7, 19.6. HRMS (ESI)  $m/z$ :  $[M+H]^+$  calcd for  $C_{18}H_{19}ON$ , 266.1539; found: 266.1534.

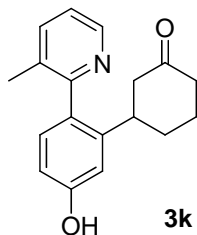

**3k**:  $^1H$  NMR (500 MHz,  $CD_3OD$ , TMS)  $\delta$  8.36 (d,  $J=4.5$  Hz, 1H), 7.77 (dd,  $J=0.5, 7.5$  Hz, 1H), 7.33 (dd,  $J=5.0, 8.0$  Hz, 1H), 6.97 (d,  $J=8.5$  Hz, 1H), 6.93 (d,  $J=2.0$  Hz, 1H), 2.54 (br, 2H), 2.20-2.44 (m, 3H), 2.13 (s, 3H), 2.01-2.04 (m, 2H), 1.80 (br, 1H), 1.35-1.37 (m, 1H);  $^{13}C$  NMR (125 MHz,  $CD_3OD$ , TMS)  $\delta$  211.9, 158.6, 157.8, 145.3, 143.6, 138.8, 133.1, 129.8, 129.7, 122.7, 113.2, 112.6, 112.4, 41.2, 40.3, 32.1, 25.3, 22.7, 18.2. HRMS (ESI)  $m/z$ :  $[M+H]^+$  calcd for  $C_{18}H_{20}O_2N$ , 282.1489; found: 282.1486.

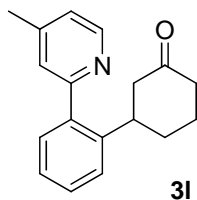

**3l**:  $^1H$  NMR (500 MHz,  $CDCl_3$ , TMS)  $\delta$  8.50 (d,  $J=5.0$  Hz, 1H), 7.38-7.42 (m, 2H), 7.25-7.32 (m, 2H), 7.15 (t,  $J=0.5$  Hz, 1H), 7.08 (ddd,  $J=0.5, 1.5, 5.0$  Hz, 1H), 3.28-3.34 (m, 1H), 2.51-2.54 (m,

2H), 2.40 (s, 3H), 2.30-2.36 (m, 2H), 2.03-2.09 (m, 2H), 1.78-1.86 (m, 1H), 1.53-1.66 (m, 1H);  
 $^{13}\text{C}$  NMR (125 MHz,  $\text{CDCl}_3$ , TMS)  $\delta$  211.6, 159.8, 149.1, 147.7, 142.4, 140.4, 130.3, 128.8, 126.5,  
126.2, 125.2, 123.2, 49.0, 41.5, 40.2, 33.0, 25.7, 21.4. HRMS (ESI)  $m/z$ :  $[\text{M}+\text{H}]^+$  calcd for  
 $\text{C}_{18}\text{H}_{20}\text{ON}$ , 266.1539; found: 266.1532.

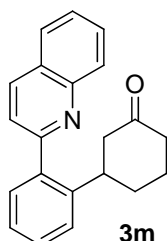

**3m:**  $^1\text{H}$  NMR (400 MHz,  $\text{CDCl}_3$ , TMS)  $\delta$  8.22 (d,  $J=8.0$  Hz, 1H), 8.13 (d,  $J=8.4$  Hz, 1H), 7.87 (d,  $J=8.0$  Hz, 1H), 7.75 (td,  $J=1.6, 8.0$  Hz, 1H), 7.57 (dt,  $J=1.2, 8.4$  Hz, 1H), 7.44-7.51 (m, 4H),  
7.33-7.37 (m, 1H), 3.36-3.44 (m, 1H), 2.67 (dd,  $J=4.0, 6.0$  Hz, 1H), 2.61 (dd,  $J=1.6, 6.0$  Hz, 1H),  
2.32-2.36 (m, 2H), 2.02-2.15 (m, 2H), 1.86 (ddd,  $J=3.6, 12.4, 25.6$  Hz, 1H), 1.47-1.59 (m, 1H);  
 $^{13}\text{C}$  NMR (125 MHz,  $\text{CDCl}_3$ , TMS)  $\delta$  211.2, 159.9, 148.0, 142.7, 140.4, 136.6, 130.4, 130.0, 129.9,  
129.2, 127.7, 126.9, 126.8, 126.75, 126.5, 122.4, 49.2, 41.4, 40.5, 33.2, 25.7. HRMS (ESI)  $m/z$ :  
 $[\text{M}+\text{H}]^+$  calcd for  $\text{C}_{21}\text{H}_{20}\text{ON}$ , 302.1539; found: 302.1533.

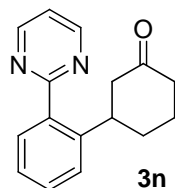

**3n:**  $^1\text{H}$  NMR (500 MHz,  $\text{CDCl}_3$ , TMS)  $\delta$  8.83 (d,  $J=5.0$  Hz, 1H), 7.71 (td,  $J=1.0, 7.5$  Hz, 1H),  
7.45-7.47 (m, 2H), 7.33-7.36 (m, 1H), 7.24 (t,  $J=5.0$  Hz, 1H), 3.68-3.74 (m, 1H), 2.62-2.68 (m,  
1H), 2.53 (dt,  $J=1.0, 7.5$  Hz, 1H), 2.33-2.44 (m, 2H), 2.04-2.13 (m, 2H), 1.82-1.90 (m, 1H),  
1.61-1.70 (m, 1H);  $^{13}\text{C}$  NMR (125 MHz,  $\text{CDCl}_3$ , TMS)  $\delta$  211.6, 167.7, 157.2, 143.2, 138.0, 131.2,  
130.0, 126.7, 126.5, 119.0, 49.2, 41.6, 40.2, 32.9, 25.8. HRMS (ESI)  $m/z$ :  $[\text{M}+\text{H}]^+$  calcd for  
 $\text{C}_{16}\text{H}_{17}\text{ON}_2$ , 253.1335; found: 253.1329.

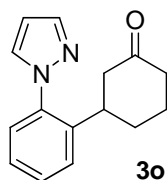

**3o:**  $^1\text{H}$  NMR (500 MHz,  $\text{CDCl}_3$ , TMS)  $\delta$  7.69 (dd,  $J=0.5, 2.0$  Hz, 1H), 7.55 (dd,  $J=0.5, 2.5$  Hz,

1H), 7.42-7.45 (m, 2H), 7.27-7.34 (m, 2H), 6.43 (t,  $J=2.0$  Hz, 1H), 2.98-3.04 (m, 1H), 2.40-2.52 (m, 2H), 2.28-2.38 (m, 2H), 1.98-2.09 (m, 2H), 1.21-1.80 (m, 1H), 1.57-1.65 (m, 1H);  $^{13}\text{C}$  NMR (125 MHz,  $\text{CDCl}_3$ , TMS)  $\delta$  210.7, 140.9, 140.7, 139.1, 131.1, 129.4, 127.33, 127.3, 127.1, 106.7, 48.4, 41.3, 38.6, 32.7, 25.5. HRMS (ESI)  $m/z$ :  $[\text{M}+\text{H}]^+$  calcd for  $\text{C}_{15}\text{H}_{17}\text{ON}_2$ , 241.1335; found: 241.1329.

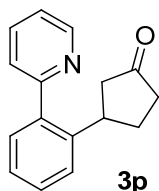

**3p**:  $^1\text{H}$  NMR (500 MHz,  $\text{CDCl}_3$ , TMS)  $\delta$  8.68-8.69 (m, 1H), 7.79 (td,  $J=2.0, 8.0$  Hz, 1H), 7.39-7.43 (m, 3H), 7.28-7.36 (m, 3H), 3.68-3.75 (m, 1H), 2.55 (dd,  $J=8.0, 18.5$  Hz, 1H), 2.41 (dd,  $J=8.0, 18.5$  Hz, 1H), 2.24-2.31 (m, 2H), 2.12-2.20 (m, 1H), 1.98-2.08 (m, 1H);  $^{13}\text{C}$  NMR (125 MHz,  $\text{CDCl}_3$ , TMS)  $\delta$  219.0, 160.1, 149.3, 141.1, 140.8, 136.9, 130.3, 129.1, 126.7, 126.0, 124.4, 122.2, 46.8, 39.1, 38.6, 31.2. HRMS (ESI)  $m/z$ :  $[\text{M}+\text{H}]^+$  calcd for  $\text{C}_{16}\text{H}_{16}\text{ON}$ , 238.1226; found: 238.1217.

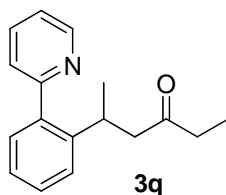

**3q**:  $^1\text{H}$  NMR (500 MHz,  $\text{CDCl}_3$ , TMS)  $\delta$  8.67 (ddd,  $J=1.0, 2.0, 5.0$  Hz, 1H), 7.71 (td,  $J=1.0, 7.5$  Hz, 1H), 7.42 (dt,  $J=1.5, 8.0$  Hz, 1H), 7.24-7.39 (m, 5H), 3.55-3.59 (m, 1H), 2.82 (dd,  $J=5.5, 15.5$  Hz, 1H), 2.54 (dd,  $J=9.0, 16.0$  Hz, 1H), 2.26 (q,  $J=7.0$  Hz, 2H), 1.20 (d,  $J=7.0$  Hz, 3H), 0.95 (t,  $J=7.5$  Hz, 3H);  $^{13}\text{C}$  NMR (125 MHz,  $\text{CDCl}_3$ , TMS)  $\delta$  210.7, 160.2, 149.3, 144.3, 140.2, 136.4, 130.1, 128.8, 126.2, 126.1, 124.5, 122.0, 51.0, 36.2, 30.9, 21.9, 7.9. HRMS (ESI)  $m/z$ :  $[\text{M}+\text{H}]^+$  calcd for  $\text{C}_{17}\text{H}_{20}\text{ON}$ , 254.1539; found: 254.1534.

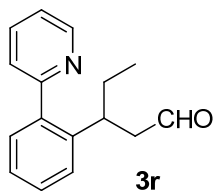

**3r**:  $^1\text{H}$  NMR (500 MHz,  $\text{CDCl}_3$ , TMS)  $\delta$  9.64 (dd,  $J=2.0, 3.0$  Hz, 1H), 8.66 (ddd,  $J=1.0, 1.5, 4.5$  Hz, 1H), 7.76 (td,  $J=1.5, 7.5$  Hz, 1H), 7.38-7.42 (m, 2H), 7.25-7.34 (m, 3H), 3.44 (m, 1H), 2.77



(ddd,  $J=2.5, 7.5, 16.5$  Hz, 1H), 2.63 (ddd,  $J=2.5, 7.5, 16.5$  Hz, 1H), 1.62 (m, 2H), 0.70 (t,  $J=7.5$  Hz, 1H);  $^{13}\text{C}$  NMR (125 MHz,  $\text{CDCl}_3$ , TMS)  $\delta$  202.9, 160.4, 149.2, 142.0, 141.2, 136.5, 130.1, 129.0, 126.6, 124.6, 122.0, 50.8, 36.7, 29.6, 12.0. HRMS (ESI)  $m/z$ :  $[\text{M}+\text{H}]^+$  calcd for  $\text{C}_{16}\text{H}_{18}\text{ON}$ , 240.1383; found: 240.1376.

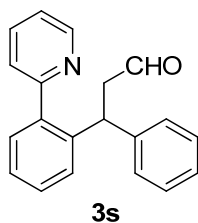

**3s**:  $^1\text{H}$  NMR (500 MHz,  $\text{CDCl}_3$ , TMS)  $\delta$  9.64 (t,  $J=2.0$  Hz, 1H), 8.70 (ddd,  $J=1.0, 1.5, 5.0$  Hz, 1H), 7.70 (td,  $J=1.5, 7.5$  Hz, 1H), 7.12-7.36 (m, 9H), 7.02-7.04 (m, 2H), 5.14 (t,  $J=7.5$  Hz, 1H), 3.17 (ddd,  $J=2.0, 7.0, 17.5$  Hz, 1H), 3.10 (ddd,  $J=2.0, 7.0, 17.5$  Hz, 1H);  $^{13}\text{C}$  NMR (125 MHz,  $\text{CDCl}_3$ , TMS)  $\delta$  201.8, 160.2, 149.2, 143.4, 141.7, 140.6, 136.7, 130.3, 129.0, 128.6, 128.1, 128.0, 126.8, 126.5, 124.6, 122.2, 49.8, 40.3. HRMS (ESI)  $m/z$ :  $[\text{M}+\text{H}]^+$  calcd for  $\text{C}_{20}\text{H}_{18}\text{ON}$ , 288.1383; found: 288.1374.

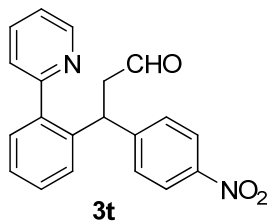

**3t**:  $^1\text{H}$  NMR (400 MHz,  $\text{CDCl}_3$ , TMS)  $\delta$  9.68 (s, 1H), 8.68 (d,  $J=4.4$  Hz, 1H), 8.03 (d,  $J=8.8$  Hz, 2H), 7.73 (td,  $J=1.6, 7.6$  Hz, 1H), 7.24-7.42 (m, 6H), 7.19 (d,  $J=7.6$  Hz, 2H), 5.34 (t,  $J=7.6$  Hz, 1H), 3.31 (ddd,  $J=1.6, 6.4, 17.2$  Hz, 1H), 3.16 (ddd,  $J=1.6, 6.4, 17.2$  Hz, 1H);  $^{13}\text{C}$  NMR (125 MHz,  $\text{CDCl}_3$ , TMS)  $\delta$  200.2, 159.8, 151.3, 149.2, 146.6, 140.6, 140.3, 137.0, 130.7, 129.2, 128.9, 127.9, 127.4, 124.6, 123.8, 122.4, 49.5, 40.0. HRMS (ESI)  $m/z$ :  $[\text{M}+\text{H}]^+$  calcd for  $\text{C}_{20}\text{H}_{17}\text{O}_3\text{N}_2$ , 333.1234; found: 333.1228.

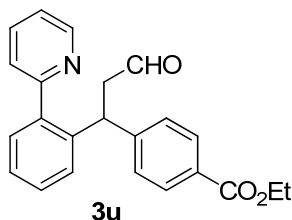

**3u**:  $^1\text{H}$  NMR (400 MHz,  $\text{CDCl}_3$ , TMS)  $\delta$  9.66 (s, 1H), 8.69 (d,  $J=4.4$  Hz, 1H), 7.85 (d,  $J=8.4$  Hz, 2H), 7.70 (td,  $J=1.6, 8.0$  Hz, 1H), 7.21-7.39 (m, 5H), 7.08 (d,  $J=8.4$  Hz, 2H), 5.24 (t,  $J=8.0$  Hz,

1H), 4.33 (q,  $J=7.2$  Hz, 2H), 3.22 (ddd,  $J=1.6, 7.2, 16.8$  Hz, 1H), 3.12 (ddd,  $J=1.6, 7.2, 16.8$  Hz, 1H), 1.35 (t,  $J=7.2$  Hz, 3H);  $^{13}\text{C}$  NMR (125 MHz,  $\text{CDCl}_3$ , TMS)  $\delta$  201.1, 166.6, 160.0, 149.2, 148.7, 140.9, 140.6, 136.8, 130.5, 129.9, 129.1, 128.8, 128.0, 127.97, 127.1, 124.6, 122.3, 61.0, 49.6, 40.3, 14.5. HRMS (ESI)  $m/z$ :  $[\text{M}+\text{H}]^+$  calcd for  $\text{C}_{23}\text{H}_{22}\text{O}_3\text{N}$ , 360.1594; found: 360.1596.

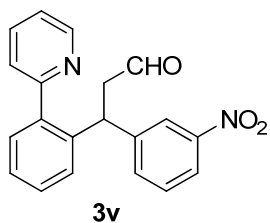

**3v**:  $^1\text{H}$  NMR (500 MHz,  $\text{CDCl}_3$ , TMS)  $\delta$  9.69 (s, 1H), 8.70 (d,  $J=4.0$  Hz, 1H), 7.97 (d,  $J=8.0$  Hz, 1H), 7.89 (s, 1H), 7.72 (td,  $J=1.5, 7.5$  Hz, 1H), 7.24-7.42 (m, 8H), 5.32 (t,  $J=7.5$  Hz, 2H), 3.32 (ddd,  $J=1.0, 6.5, 17.0$  Hz, 1H), 3.20 (ddd,  $J=1.0, 6.5, 17.0$  Hz, 1H);  $^{13}\text{C}$  NMR (125 MHz,  $\text{CDCl}_3$ , TMS)  $\delta$  200.2, 159.8, 149.2, 148.4, 145.8, 140.6, 140.4, 137.0, 134.5, 130.6, 129.4, 129.2, 127.8, 127.4, 124.5, 12.8, 122.4, 121.6, 49.5, 39.8. HRMS (ESI)  $m/z$ :  $[\text{M}+\text{H}]^+$  calcd for  $\text{C}_{20}\text{H}_{17}\text{O}_2\text{N}_3$ , 333.1234; found: 333.1236.

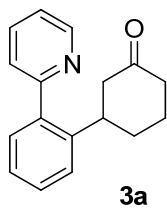

1370 3a

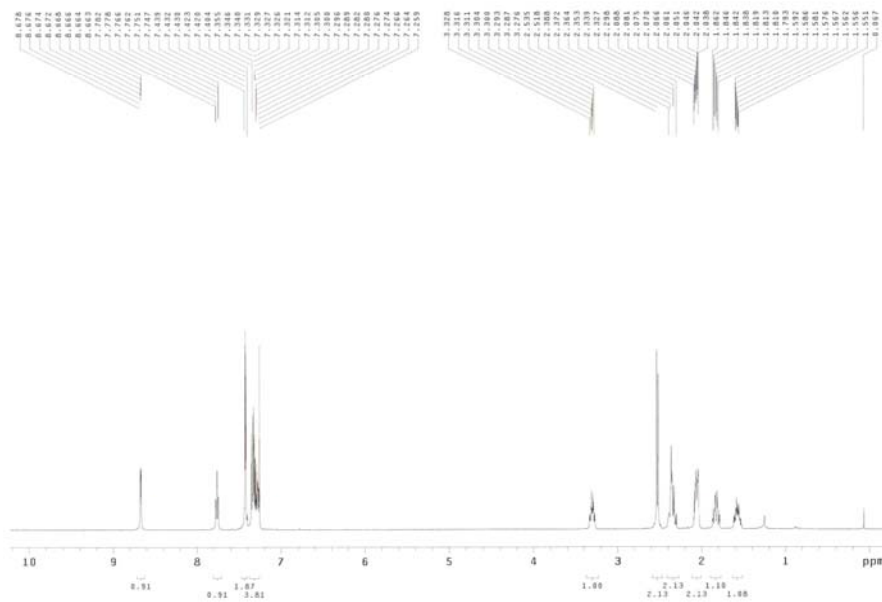

1370 3a

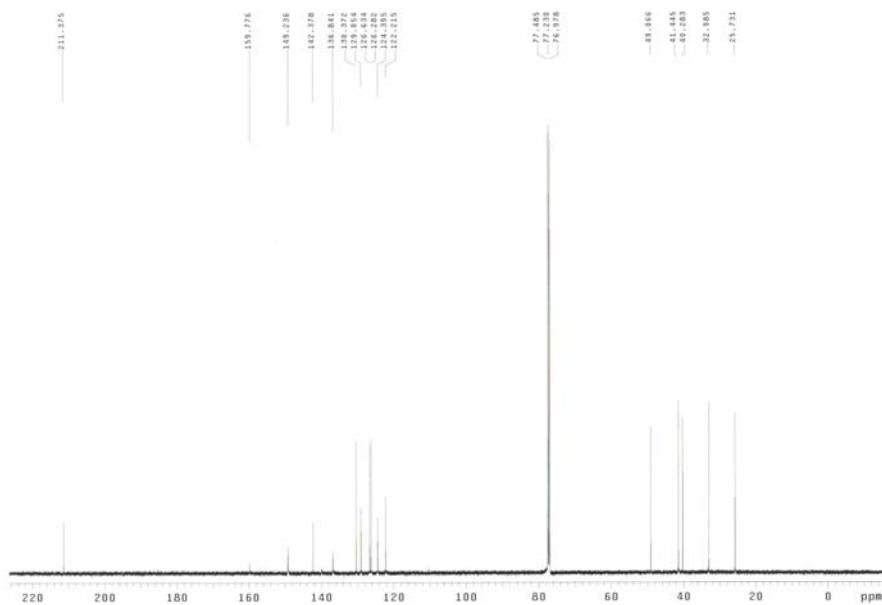







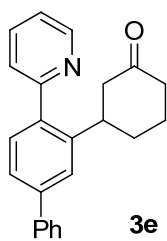

1637-169 3e

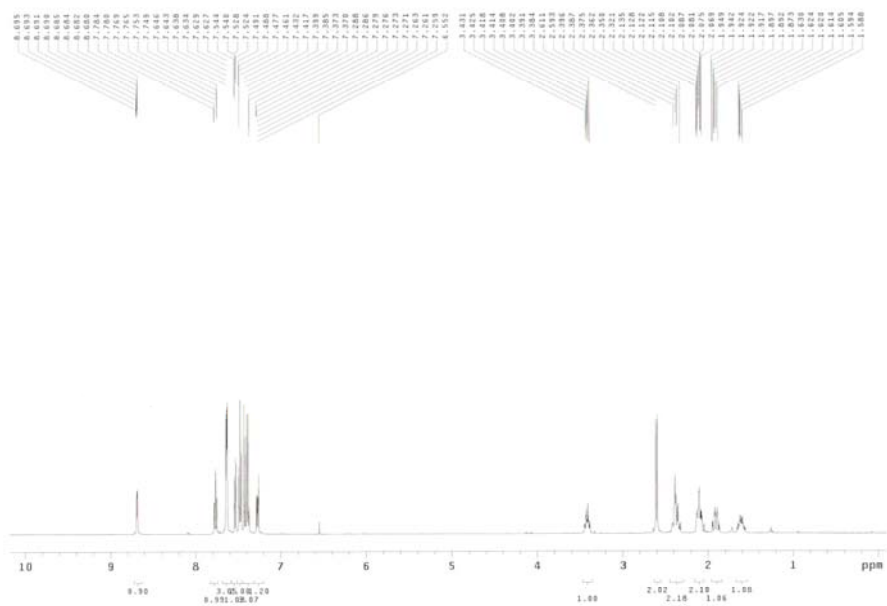

1637-169 3e

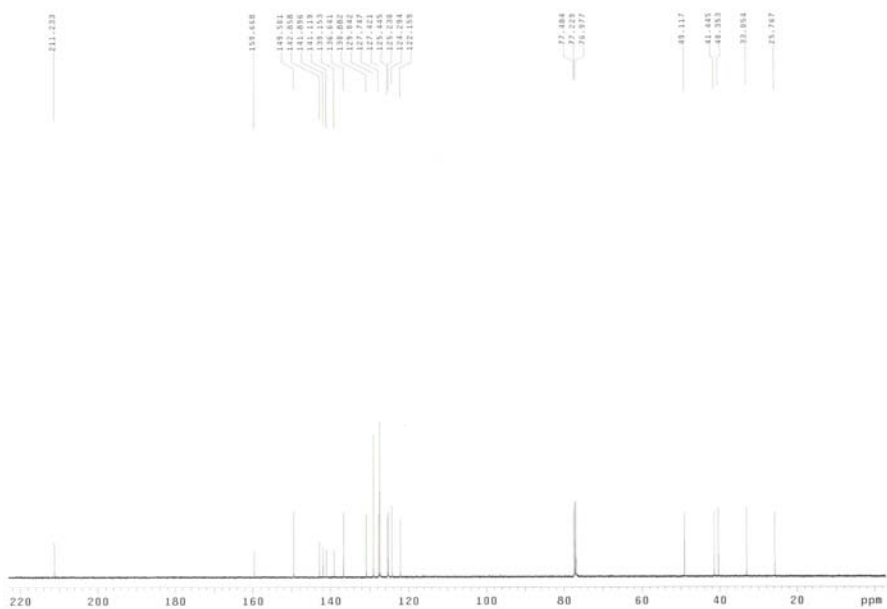











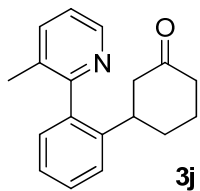

(400L - 500MHz) 3j

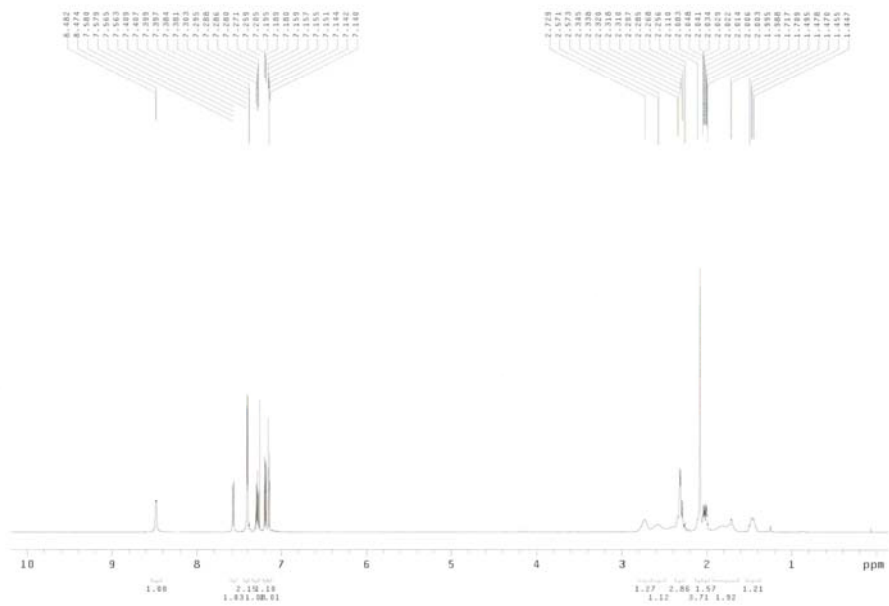

(400L - 500MHz) 3j

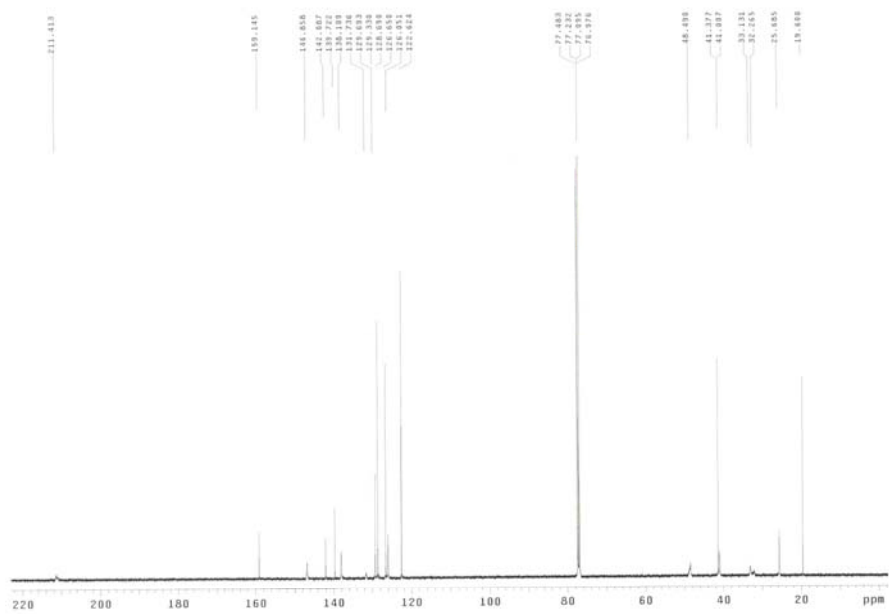



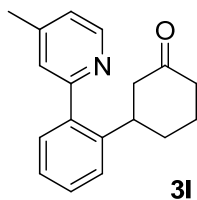

MS-31

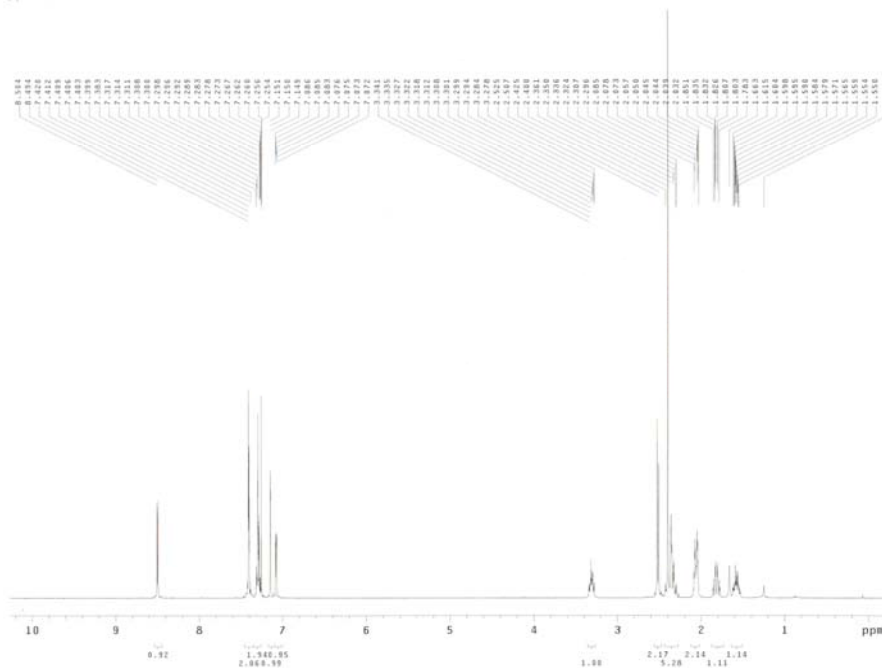







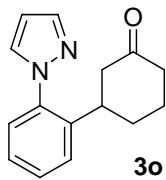

1H NMR 30

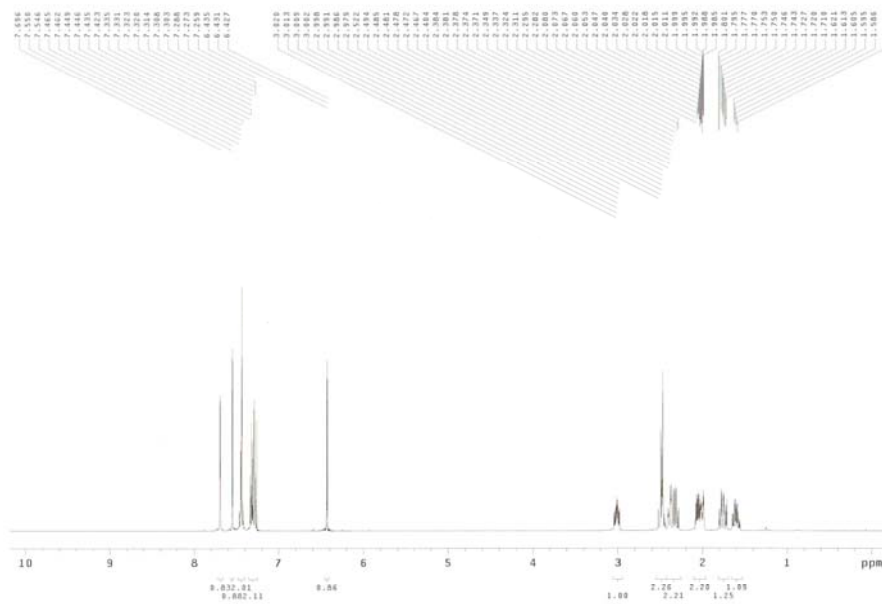

13C NMR 30

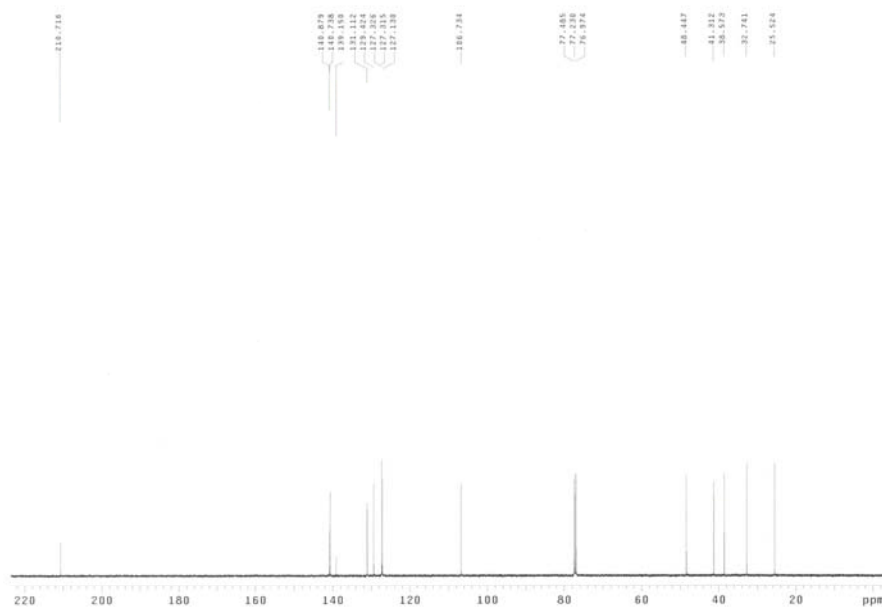

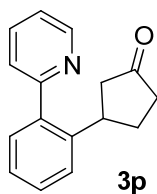

131 3p

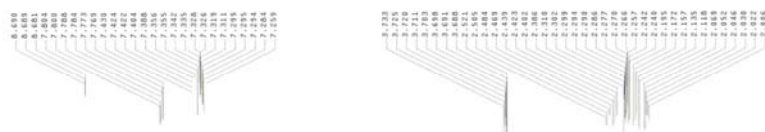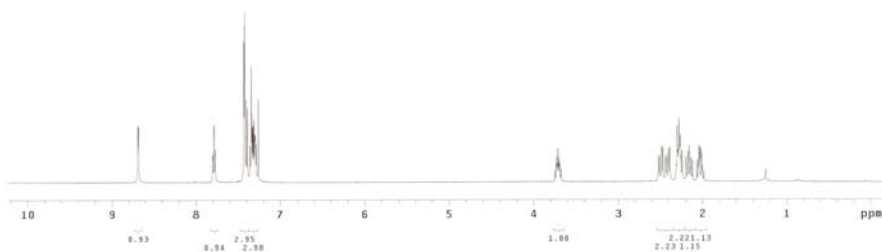

591 3p

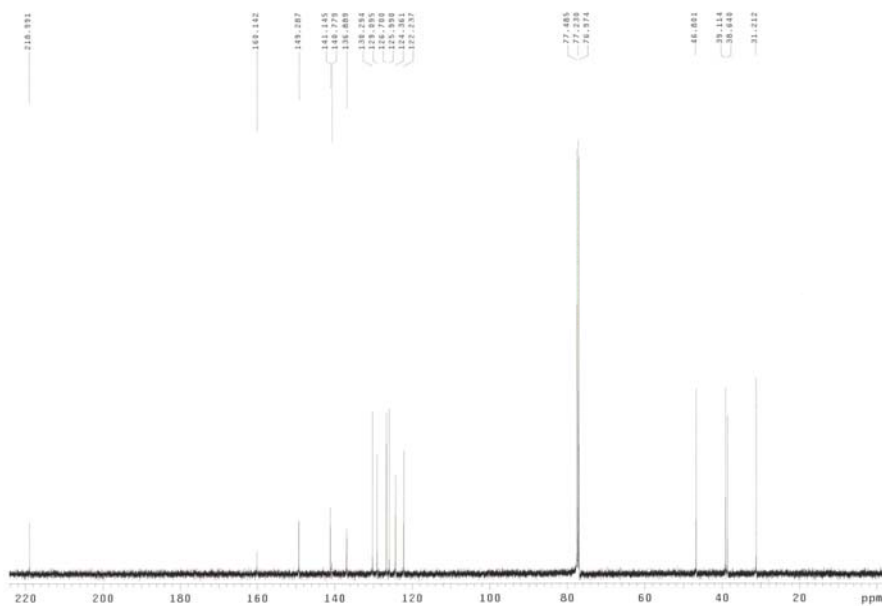

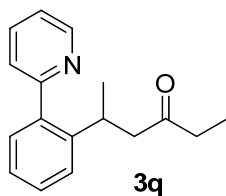

1466 3q

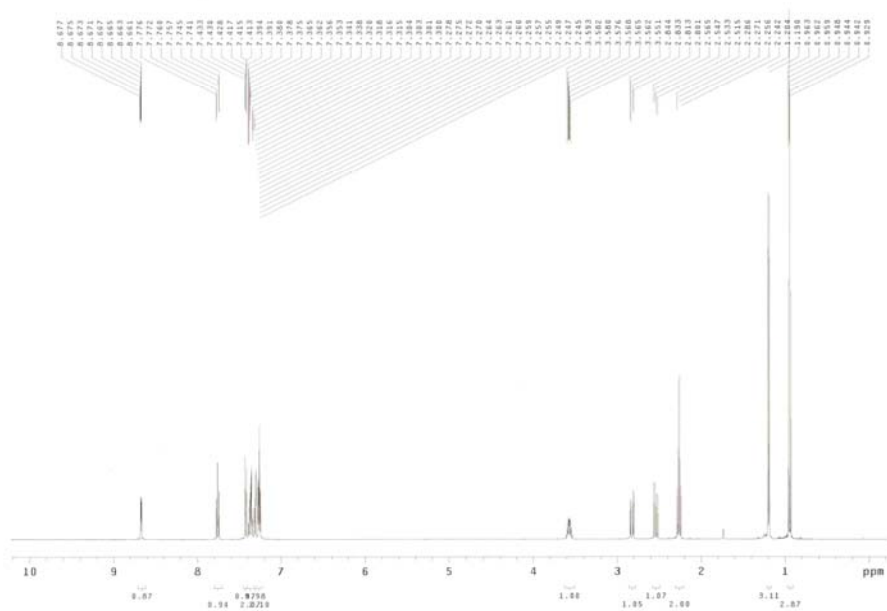

1466 3q

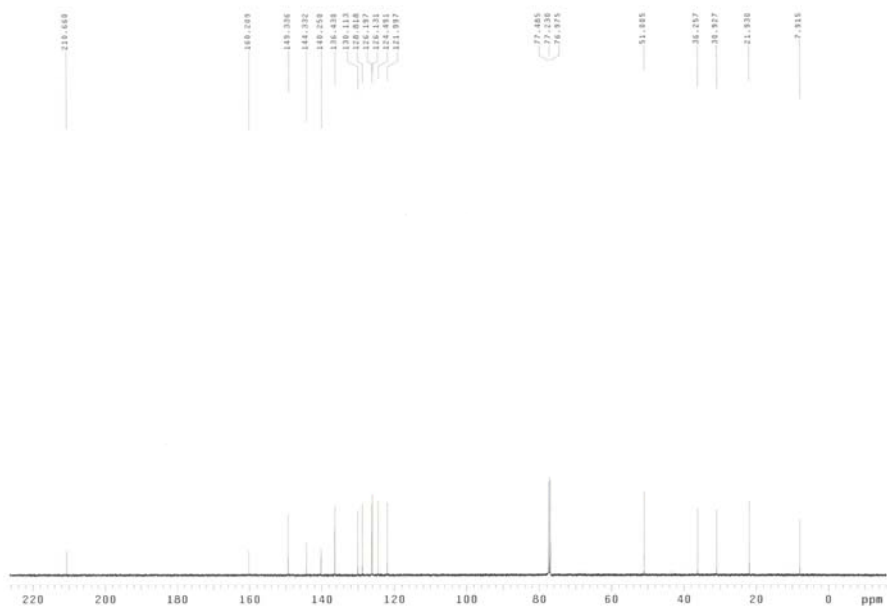

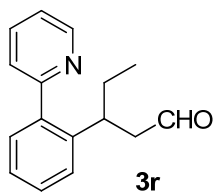

1441-5000 3r

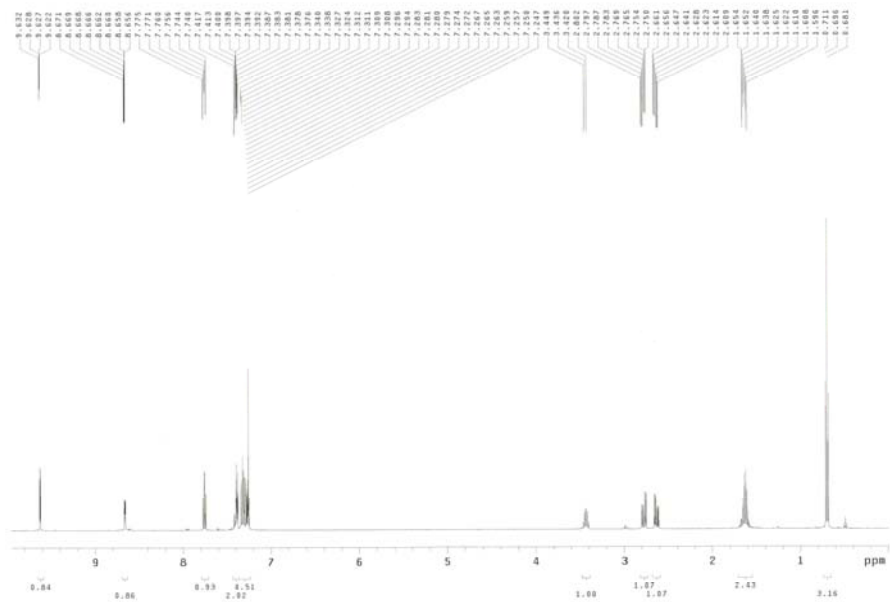

1446-5000 3r

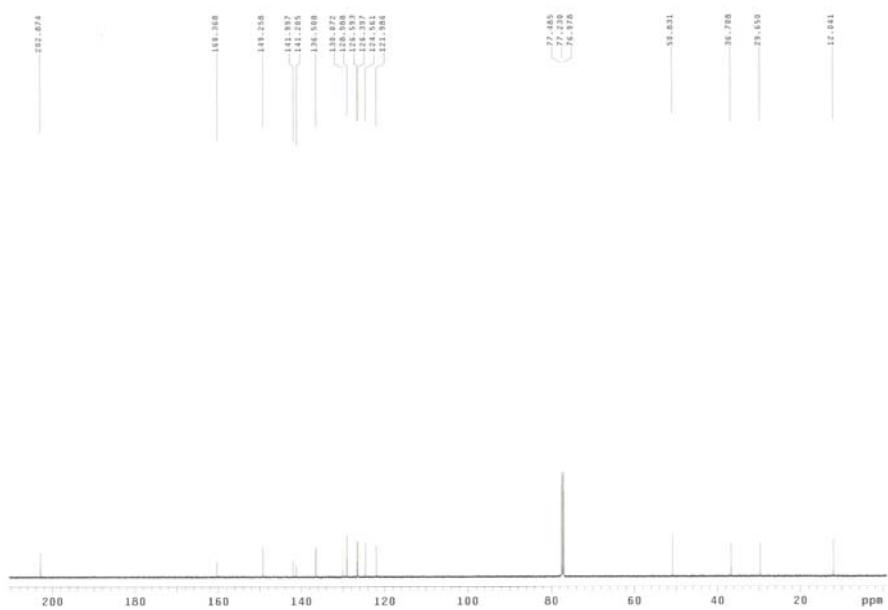

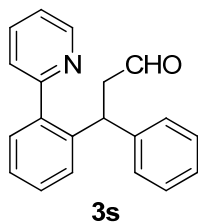

163-1000-35

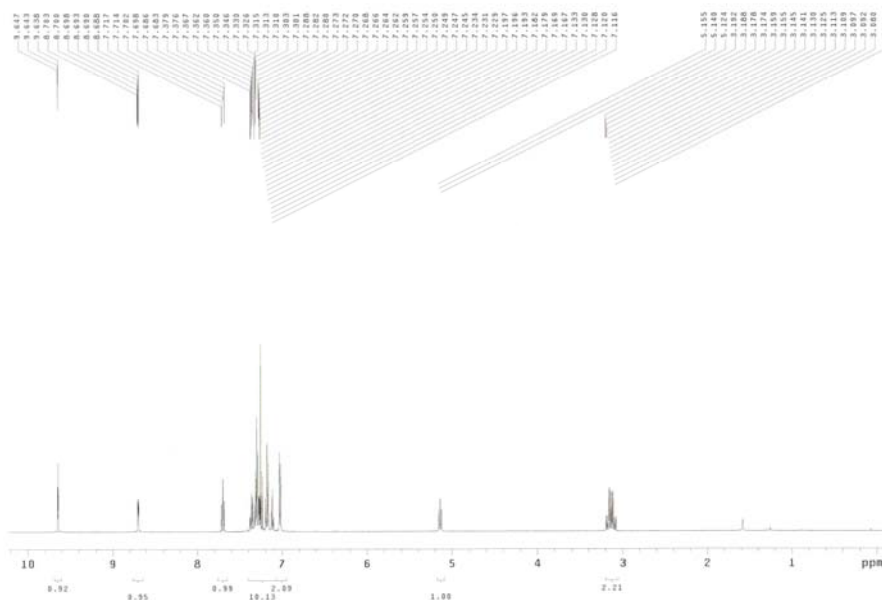

163-1000-35

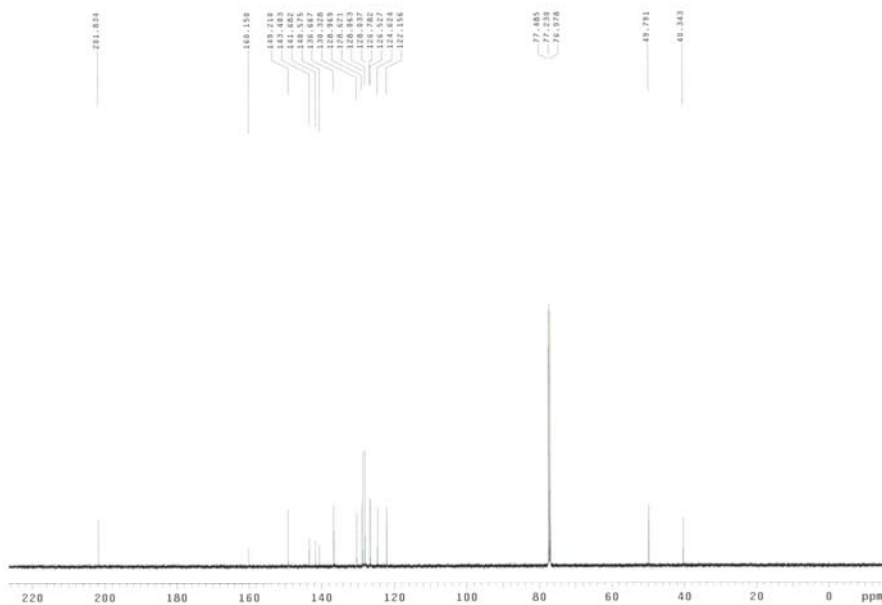

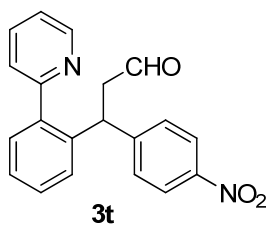

300 - 400M 3t

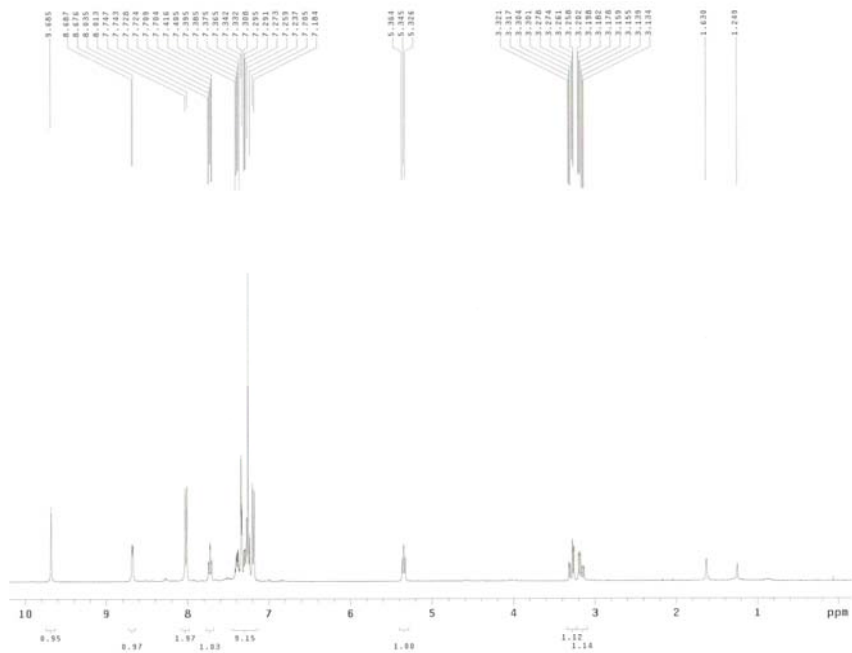

1304 - 500M 3t

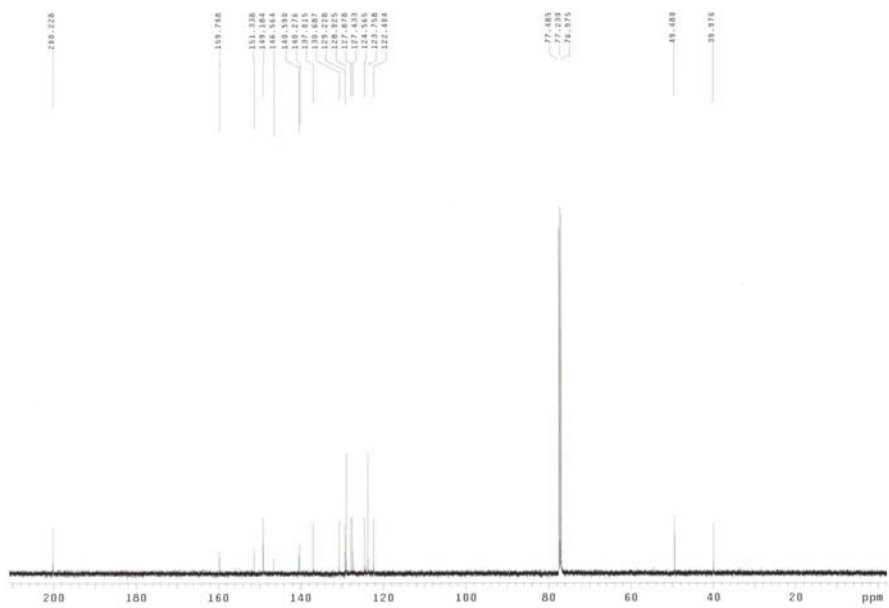



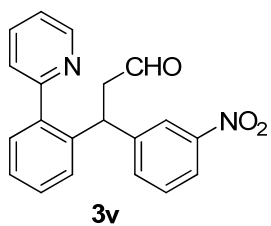

<sup>1</sup>H NMR (CDCl<sub>3</sub>) 3V

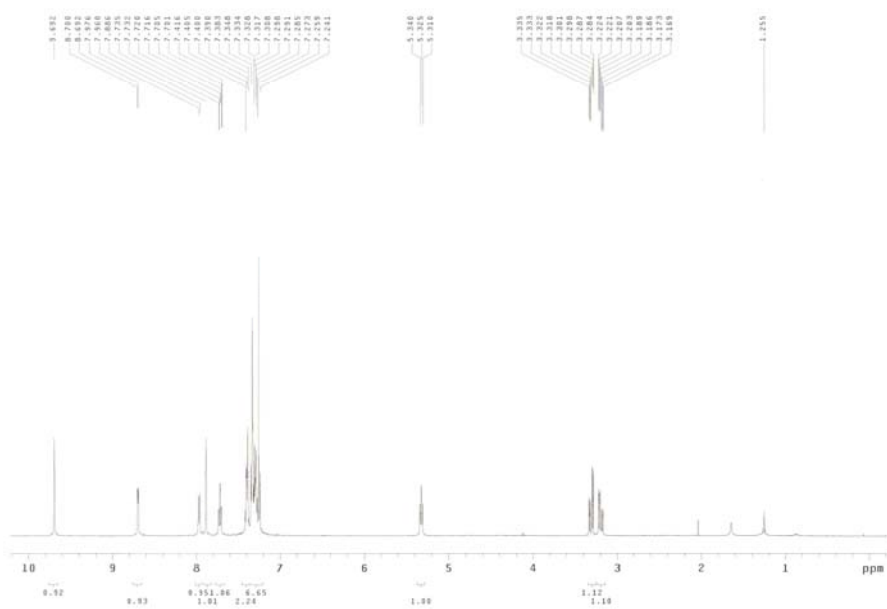

<sup>13</sup>C NMR (CDCl<sub>3</sub>) 3V

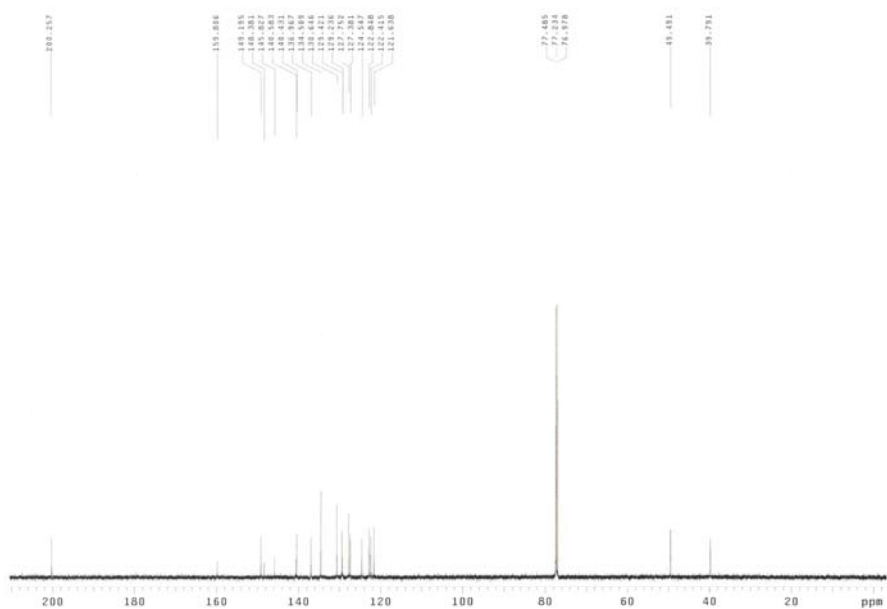

Supplement: c1ob05993a.pdf [file c1ob05993a.pdf]
